# Supplementary material
Source: publisher figshare collection journal article supplement (https://acs.figshare.com/ndownloader/files/5769075)
Supplement: Supplementary file 1 [file 5769075]

A flavor compound that is in an oil and water mixture and in a closed system with air will equilibrate and distribute itself between these mixture phases and air in a constant ratio, at a given temperature. The flavor mass is redistributed in these different phases according to the different partition coefficients.

$$m_I = m_A + m_W + m_O ; \quad \text{Emulsion case (mixture with an oil volumic fraction } f_o) \quad (1)$$

$$m_I = m_A + m_W ; \quad \text{Water case} \quad (1b)$$

$$K_{AW} = \frac{C_A}{C_W} \quad (2)$$

$$K_{OW} = \frac{C_O}{C_W}$$

with m referring to the flavor mass at equilibrium, K referring to partition coefficient and C referring to flavor concentration. The subscripts <sub>i</sub>, <sub>A</sub>, <sub>W</sub> and <sub>O</sub> refer respectively to Initial, Air, Water and Oil.

As a first hypothesis in the model, we disregard any irreversible ab- or adsorption between flavor compounds and any mixture component such as lactose or milk protein. We set that each flavor compound F with an initial mass  $m_i$  has only three possible environments to distribute: air, water and oil phases. All non-lipid phases in the samples are counted as "water".

Experimentally, we followed the headspace peak area released in air after equilibration for the emulsion case:  $(m_A)_{fo}$ , flavor mass in the air phase for a system with a oil volumic fraction  $f_o$ , normalized to the headspace peak area of the same flavor compound released in water:  $(m_A)_{water}$ . This measured amount is the expression (3).

$$\frac{(m_A)_{fo}}{(m_A)_{water}} \quad (3)$$

Replacing  $m_A$  by its value from expression (1),

$$\left( \frac{m_A}{m_I} \right)_{fo} = 1 - \frac{m_O + m_W}{m_I} = 1 - \frac{V_O C_O + V_W C_W}{V_A C_A + V_O C_O + V_W C_W} \quad (4)$$

with V referring to the phase volume.

This later expression is then multiplied by the identity term of  $(1/V_T C_A)/(1/V_T C_A)$ .  $V_T$  refers to the mixture volume ( $V_O + V_W$ ). Using the expression (2), we obtain:

$$\left( \frac{m_A}{m_I} \right)_{fo} = 1 - \frac{\frac{V_O C_O}{V_T C_A} + \frac{V_W C_W}{V_T C_A}}{\frac{V_A C_A}{V_T C_A} + \frac{V_O C_O}{V_T C_A} + \frac{V_W C_W}{V_T C_A}} = 1 - \frac{f_o K_{OA} + (1 - f_o) K_{WA}}{\left( \frac{V_A}{V_T} \right)_{fo} + f_o K_{OA} + (1 - f_o) K_{WA}} \quad (5)$$

Because  $K_{OA} = \frac{C_O}{C_A} = \frac{C_O}{C_W} \frac{C_W}{C_A} = K_{OW} K_{WA}$ , Then (5) can be written as:

$$\left(\frac{m_A}{m_I}\right)_{f_o} = 1 - \frac{K_{WA}(f_o K_{OW} + f_w)}{K_{WA}(f_o K_{OW} + f_w) + \left(\frac{V_A}{V_T}\right)_{f_o}} \quad (6)$$

We proceed in the same way for the water case by using the expression (1b).

$$\left(\frac{m_A}{m_I}\right)_{water} = \left(1 - \frac{m_w}{m_I}\right)_{water} = 1 - \frac{V_w C_w}{V_w C_w + V_A C_A}$$

multiplied by the identity term of  $(1/V_w C_A)/(1/V_w C_A)$ ,

$$\left(\frac{m_A}{m_I}\right)_{water} = 1 - \frac{\frac{V_w C_w}{V_w C_A}}{\frac{V_w C_w}{V_w C_A} + \frac{V_A C_A}{V_w C_A}} = 1 - \frac{K_{WA}}{K_{WA} + \left(\frac{V_A}{V_w}\right)_{water}}$$

Finally, we obtain:

$$\frac{(m_A)_{f_o}}{(m_A)_{water}} = \frac{\left(\frac{m_A}{m_I}\right)_{f_o}}{\left(\frac{m_A}{m_I}\right)_{water}} = \frac{1 - \frac{K_{WA}(f_o K_{OW} + f_w)}{K_{WA}(f_o K_{OW} + f_w) + \left(\frac{V_A}{V_T}\right)_{f_o}}}{1 - \frac{K_{WA}}{K_{WA} + \left(\frac{V_A}{V_T}\right)_{water}}} = \frac{\left(\frac{V_A}{V_T}\right)_{f_o} \left(K_{WA} + \left(\frac{V_A}{V_T}\right)_{water}\right)}{\left(\frac{V_A}{V_T}\right)_{water} \left(K_{WA}(f_o K_{OW} + f_w) + \left(\frac{V_A}{V_T}\right)_{water}\right)}$$

where  $f_w$  is the water volumic fraction ( $f_w + f_o = 1$ ).

As the model is based on volumic fraction, the density of milkfat (0.86g/ml) was also taken into account. Each experiment was made in a 2ml vial.

In case of water, the mass of aqueous solution was 800mg,  $V_A = V_{vial} - V_w$  was then 1.2ml.

In case of emulsions,

$$V_A + V_o + V_w = 2ml$$

$$f_o = \frac{V_o}{V_o + V_w}$$

$$d = 0.86 = \frac{m_{fat}}{V_o} \Rightarrow V_o = \frac{m_{fat}}{0.86}$$

$$V_T = V_o + V_w = \frac{V_o}{f_o} = \frac{m_{fat}}{0.86 f_o}$$

$$V_A = 2 - \frac{m_{fat}}{0.86 f_o}$$
